# Supplementary material
Source: PubMed Central journal article supplement (PMC4291213)
Supplement: Supp_Figure1.pdf [file Supp_Figure1.pdf]

## Supplementary Data

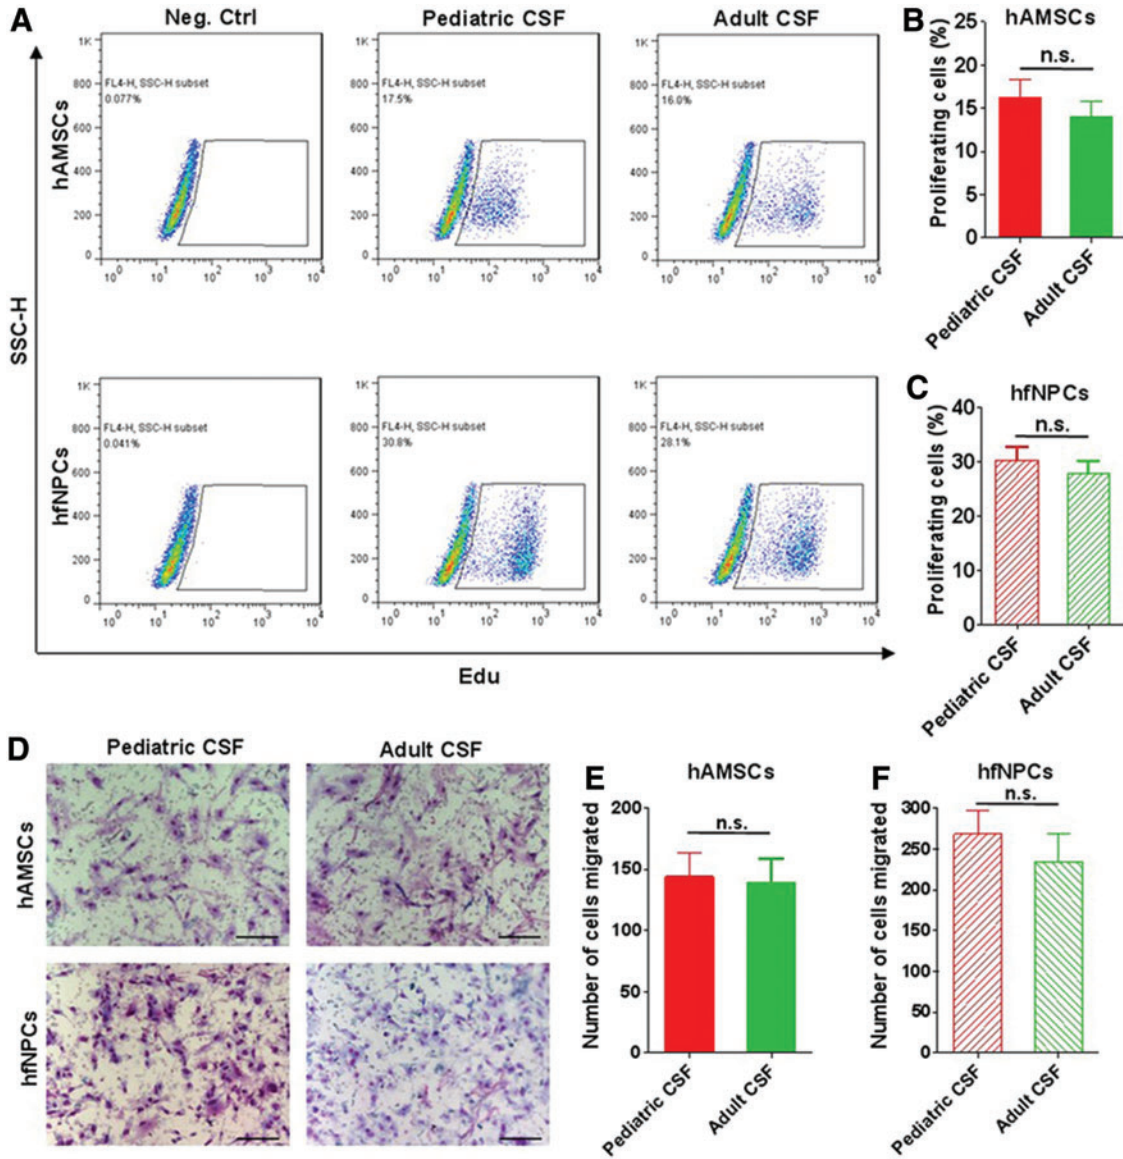

**SUPPLEMENTARY FIG. S1.** The effect of pediatric CSF and adult CSF on the function of hAMSCs and hfNPCs. hAMSCs and hfNPCs were precultured in either complete media with 25% pediatric CSF or with 25% adult CSF. **(A)** Flow cytometry of Edu showed that both hAMSCs **(B)** and hfNPCs **(C)** cultured in pediatric CSF displayed no significant difference in proliferation when compared to those cultured in adult CSF. Boyden chamber transwell assays indicated that there was no significant difference between pediatric CSF and adult CSF on migration capacities of hAMSCs and hfNPCs **(D-F)**. Scale bars = 100  $\mu$ m **(A)**. CSF, cerebrospinal fluid; hAMSCs, human adipose-derived mesenchymal stem cells; hfNPCs, human fetal-derived neural progenitor cells.
