# Supplementary material
Source: PubMed Central journal article supplement (PMC4291213)
Supplement: Supp_Figure2.pdf [file Supp_Figure2.pdf]

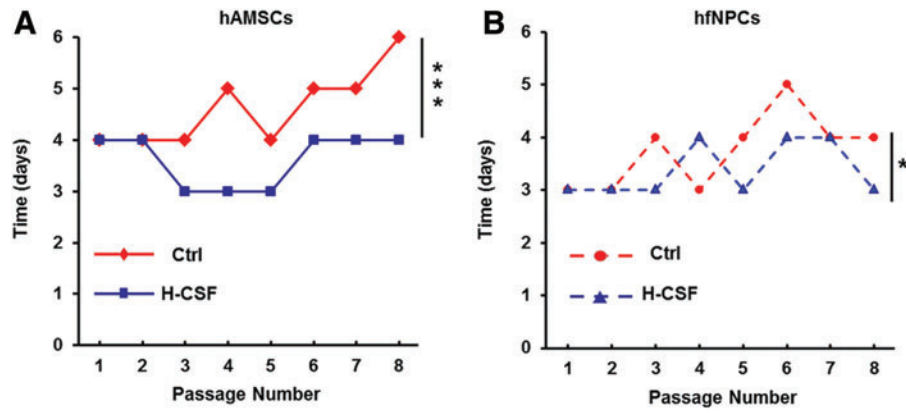

**SUPPLEMENTARY FIG. S2.** H-CSF induced an increase in the proliferation of hAMSCs and hfNPCs. The hAMSCs and hfNPCs were pretreated in 25% CSF + 75% complete media (H-CSF) and 100% complete media (Ctrl) respectively. Both (A) hAMSCs and (B) hfNPCs displayed a shorter doubling time when cultured in H-CSF (hAMSCs: Ctrl vs. H-CSF,  $P < 0.05$ ; hfNPCs: Ctrl vs. H-CSF,  $P < 0.05$ , RM ANOVA).
