# Supplementary material
Source: PubMed Central journal article supplement (PMC4291213)
Supplement: Supp_Figure3.pdf [file Supp_Figure3.pdf]

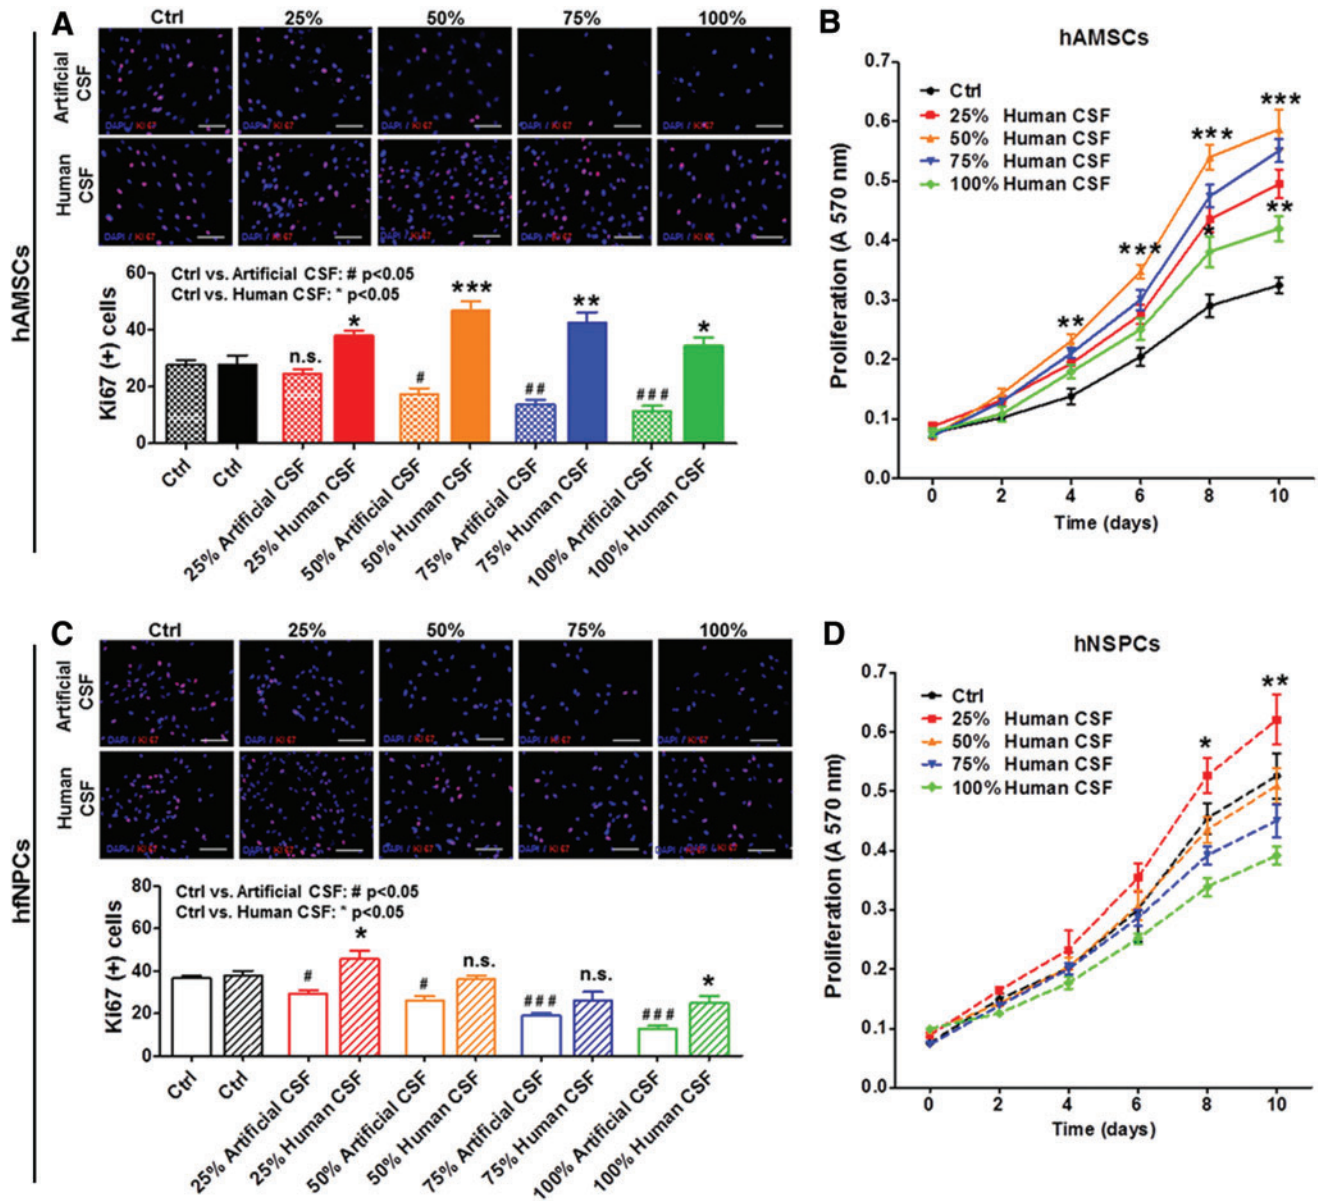

**SUPPLEMENTARY FIG. S3.** CSF concentration and its effect on proliferation. The various concentrations of H-CSF and A-CSF were tested using hAMSCs and hfNPCs to analyze the effect concentration has on proliferation. (A, C) Cells were stained with Ki67 (red) and DAPI (blue). (A) Ki67 staining revealed that hAMSCs cultured in 50% human CSF and complete media for 3 days exhibited the greatest amount of proliferation when compared with the control group. (B) These results were also confirmed by performing an MTT assay in which 50% human CSF with complete media exhibited the greatest rate of proliferation at days 4, 6, 8, and 10. (C) The hfNPCs exhibited the greatest change in proliferation in 25% human CSF and complete media after 3 days in incubation as confirmed by Ki67 staining. (D) The MTT assay also indicated that 25% human CSF displayed the greatest increase in proliferation at days 6, 8, and 10. Scale bars = 100  $\mu$ m (A, C). \* $P < 0.05$ , \*\* $P < 0.01$ , \*\*\* $P < 0.001$ .
