# Supplementary material
Source: PubMed Central journal article supplement (PMC4291213)
Supplement: Supp_Figure4.pdf [file Supp_Figure4.pdf]

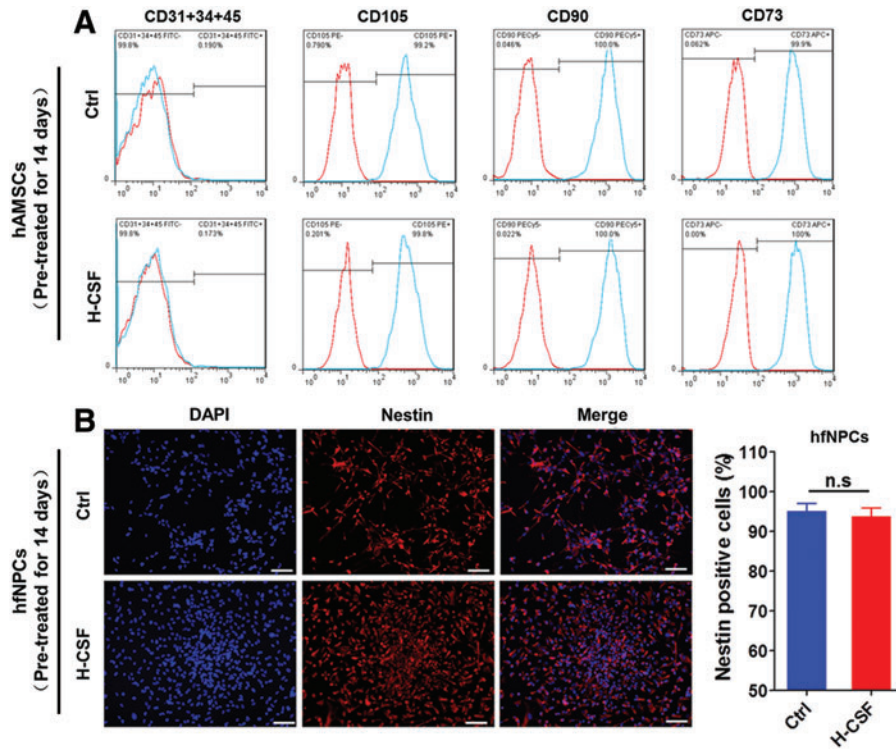

**SUPPLEMENTARY FIG. S4.** H-CSF could not affect the stemness of hAMSCs and hfNPCs. hAMSCs and hfNPCs were precultured in H-CSF or Ctrl conditions for 14 days. **(A)** Flow cytometry of CD31, CD34, CD45, CD73, CD90, and CD105 were performed to test the stemness of hAMSCs. hAMSCs did not undergo significant expression changes in these markers when compared with the Ctrl group after culturing in H-CSF for 14 days. **(B)** The hfNPCs displayed no significant difference in the number of Nestin-positive cells between the Ctrl and H-CSF group [Cells were stained with Nestin (*red*) and DAPI (*blue*)]. Scale bars = 200  $\mu$ m.
