# Supplementary material
Source: PubMed Central journal article supplement (PMC4291213)
Supplement: Supp_Figure5.pdf [file Supp_Figure5.pdf]

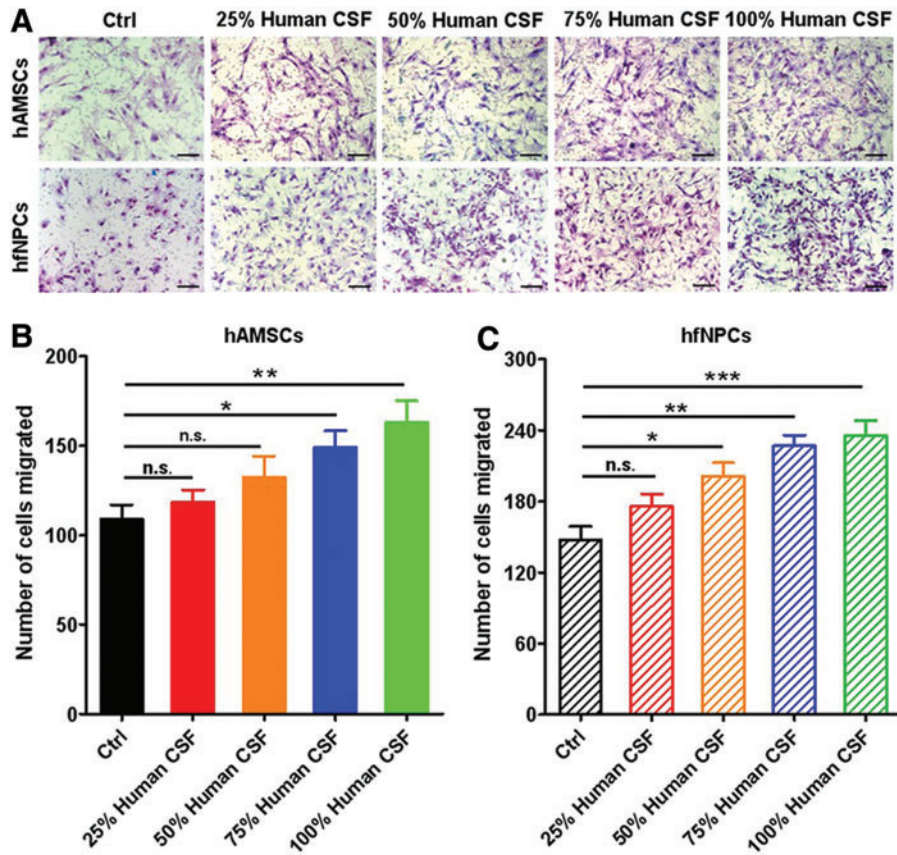

**SUPPLEMENTARY FIG. S5.** CSF concentration and its effect on migration. hAMSCs and hfNPCs were precultured in their respective concentrations of human CSF for 2 days and then seeded in Boyden chamber transwell assays for 16 h to assess changes in migration (A). Both hAMSCs (B) and hfNPCs (C) displayed the greatest number of migrated cells when precultured in 100% human CSF. Scale bars = 100  $\mu$ m (A). \* $P < 0.05$ , \*\* $P < 0.01$ , \*\*\* $P < 0.001$ .
