# Supplementary material
Source: PubMed Central journal article supplement (PMC4291213)
Supplement: Supp_Table1.pdf [file Supp_Table1.pdf]

SUPPLEMENTARY TABLE S1. THE CONCENTRATION OF IGF-1 IN CEREBROSPINAL FLUID SAMPLES

| <i>Age</i> | <i>Patient's no.</i> | <i>Gender</i> | <i>IGF-1 (ng/mL)</i> |
|------------|----------------------|---------------|----------------------|
| 2          | 10                   | M             | 11.53                |
| 3          | 6                    | F             | 7.21                 |
| 16         | 5                    | F             | 5.00                 |
| 17         | 7                    | M             | 12.25                |
| 19         | 1                    | F             | 5.25                 |
| 19         | 2                    | M             | 7.99                 |
| 25         | 11                   | F             | 9.20                 |
| 32         | 3                    | M             | 6.03                 |
| 39         | 8                    | F             | 8.27                 |
| 49         | 9                    | F             | 7.56                 |
| 76         | 4                    | M             | 3.12                 |

We tested the IGF-1 levels of all samples. There was no significant difference in the concentration of IGF-1 between the pediatric (younger than 18 years) and adult (older than 18 years) CSF samples. The mean concentration of IGF-1 in pediatric CSF was  $8.99 \pm 3.47$  ng/mL, and in adults was  $6.77 \pm 2.09$  ng/mL (pediatric vs. adult,  $P=0.27$ ). Moreover, the concentration of IGF-1 in pooled CSF was  $7.58 \pm 0.827$  ng/mL.

CSF, cerebrospinal fluid; IGF-1, insulin-like growth factor-1.
